# Supplementary material for: Manipulating the properties of MLCT excited states
Source: Royal Society of Chemistry journal article supplement (doi:10.1039/b206375a), 2002-01-01

## SUPPLEMENTARY MATERIAL

**TITLE:** *Manipulating the Properties of MLCT Excited States*

**AUTHORS:** P.A. Anderson, F.R. Keene, T.J. Meyer, J.A. Moss, G.F. Strouse and J.A. Treadway

### Supplementary Figure S1.

Absorbance spectrum for  $[\text{Ru}(\text{Me}_2\text{bpy})\{\text{bpy}(\text{COOEt})_2\}(\text{Et}_2\text{dte})]^+$  in acetonitrile illustrating band assignments.

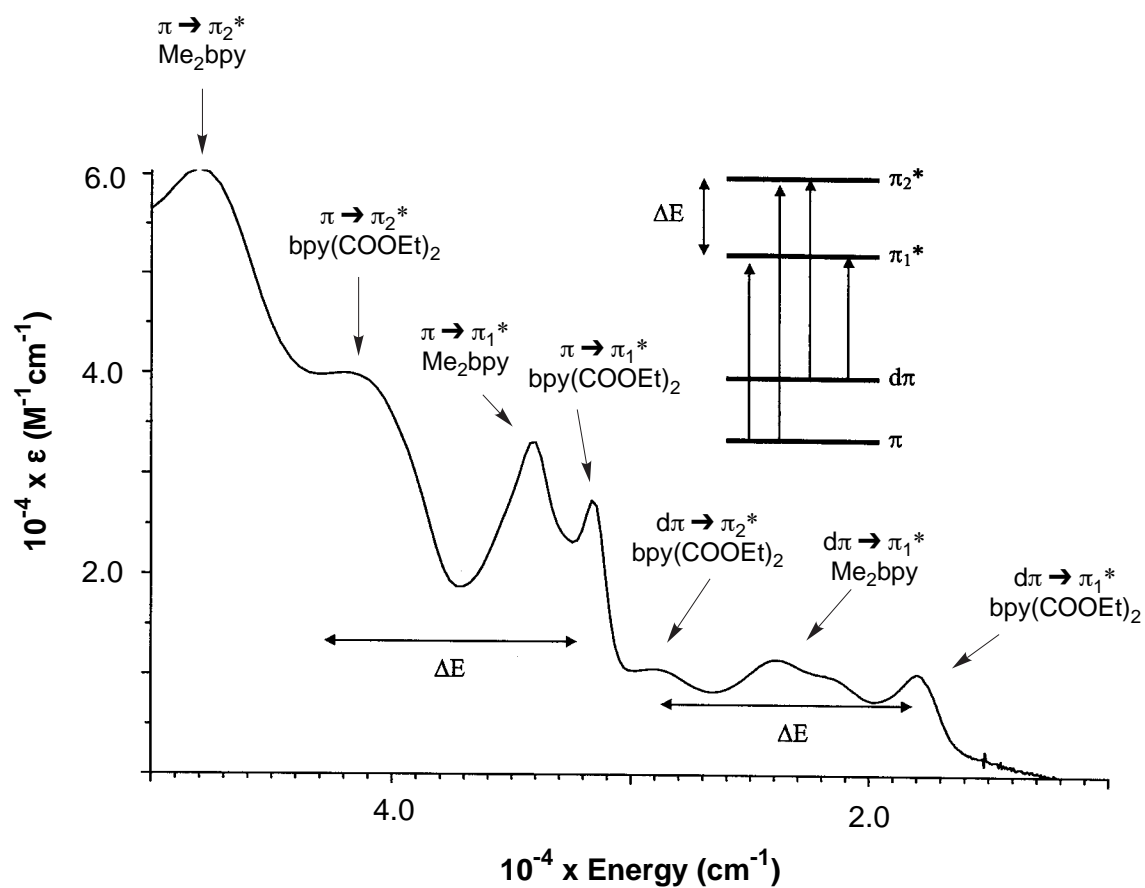

**Supplementary Figure S2.**

Emission spectra for the complexes  $[\text{Ru}(\text{Me}_2\text{bpy})(\text{Me}_4\text{bpy})(\text{BL})]^{2+}$  in acetonitrile solution at room temperature {BL = dpq (right), dpp (left)}. The spectra have been baseline-subtracted and normalized to a constant maximum intensity. The truncation of the data at the red edge of the dpq spectrum is due to lack of red sensitivity of the instrument.

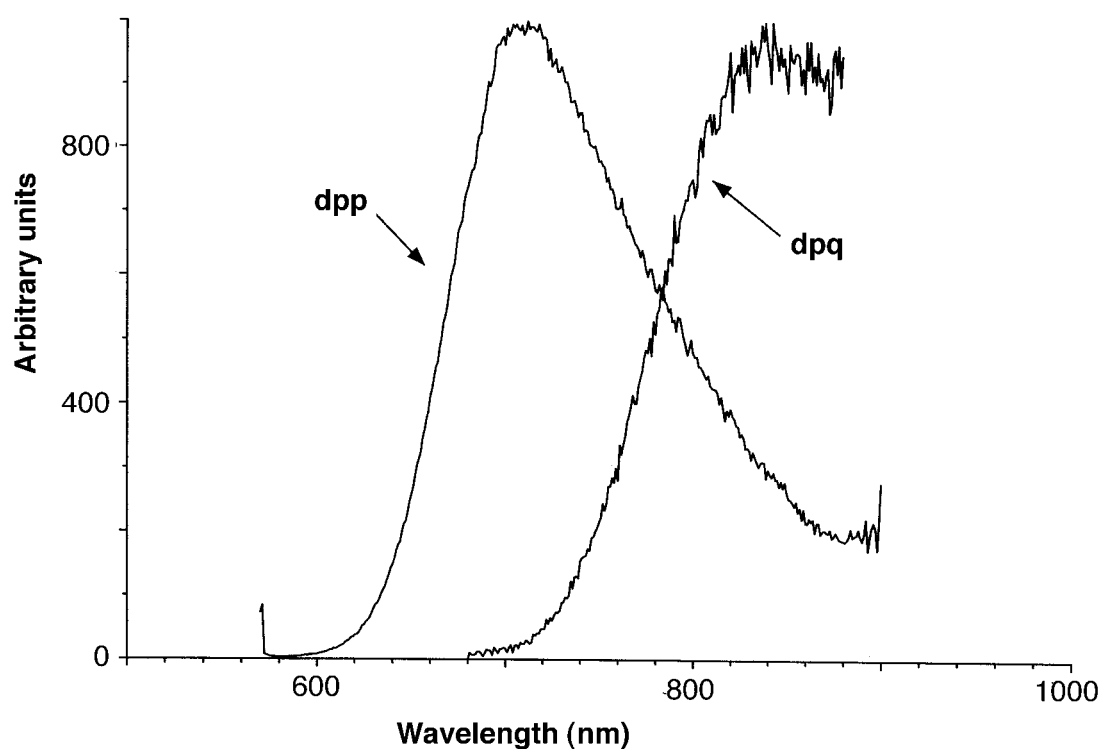

**Supplementary Figure S3.**

Results of temperature-dependent luminescence measurements on  $[\text{Ru}(\text{bpy})_2(\text{dpp})(\text{PF}_6)_2]$ . The solid line is a least-squares best fit of the data to the model given in the text.

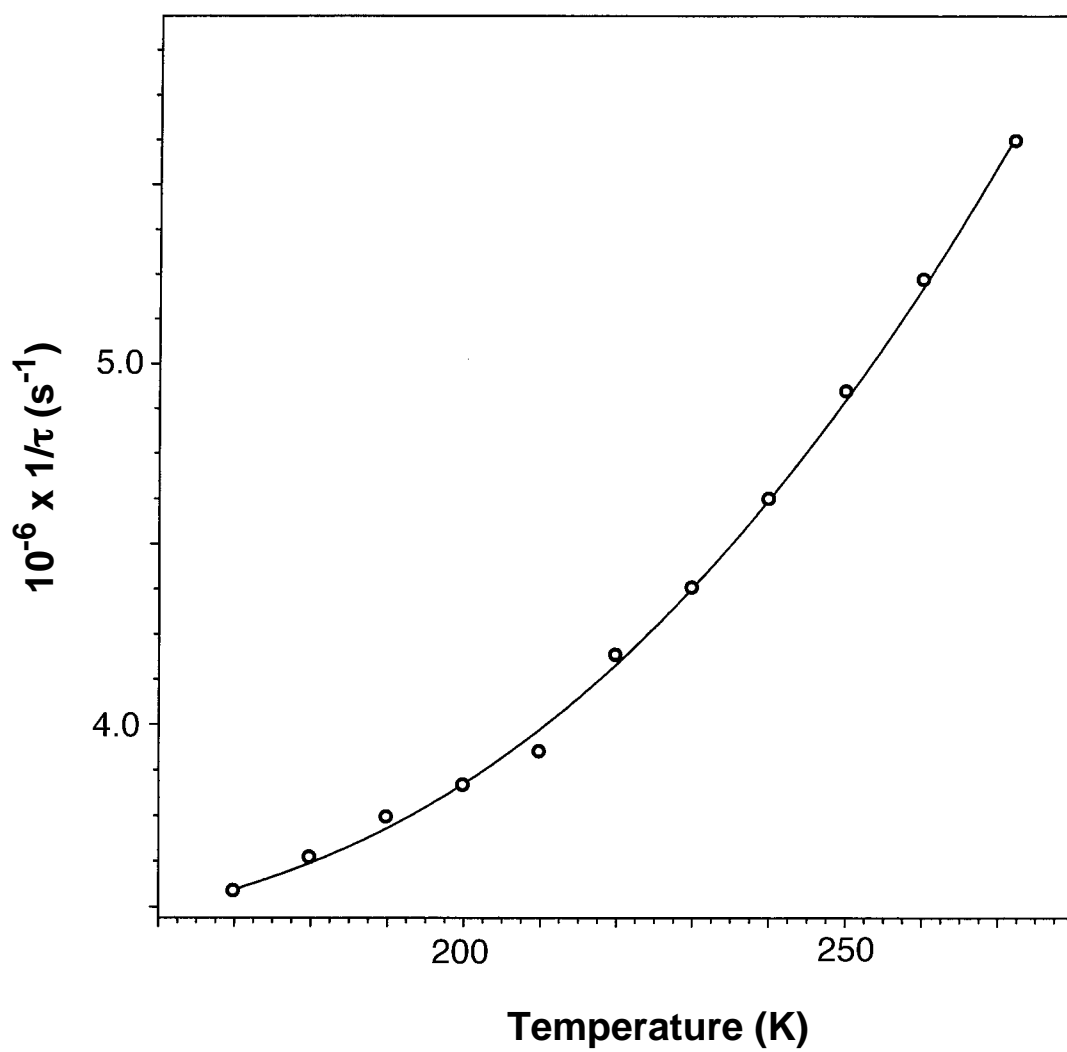

Supplement: b206375a.pdf [file b206375a.pdf]
